# Supplementary material for: Accurate Quantitative Histomorphometric-Mathematical Image Analysis Methodology of Rodent Testicular Tissue and Its Possible Future Research Perspectives in Andrology and Reproductive Medicine
Source: MDPI journal article supplement (doi:10.3390/life12020189), 2022-01-27
Supplement: s1 [file s1]

# Supplementary Materials

In addition to

## ‘Accurate Quantitative Histomorphometric-Mathematical Image Analysis Methodology of Rodent Testicular Tissue and its Possible Future Research Perspectives in Andrology and Reproductive Medicine’

Original article

### Statistical Analysis

Measurements were carried out between November 2019 and October 2020. Some details of the methodology has to be presented on the first-corresponding author's (Réka Eszter Sziva MD PhD) PhD Complex Examination on 10 June 2020 during her PhD studies at the PhD School of Semmelweis University, Károly Rácz Clinical Medicine Doctoral School, Budapest, Hungary.

Statistical analysis and figures were made with the help of GraphPad Prism 7.0 (GraphPad Software, San Diego, CA, USA) software. After checking Kolmogorov-Smirnov, D'Agostino and Pearson omnibus and Shapiro-Wilk normality tests, in case of data with normal distribution, we used parametric unpaired T-test with F-test, data with non-normal distribution were analyzed with non-parametric Mann-Whitney U-test.  $p < 0.05$  was considered statistically significant for all statistical analyses. Values with normal distribution are expressed as Mean  $\pm$  SEM, data with non-normal distribution are expressed as Median [IQR].

### • Total seminiferous tubule number (pieces)

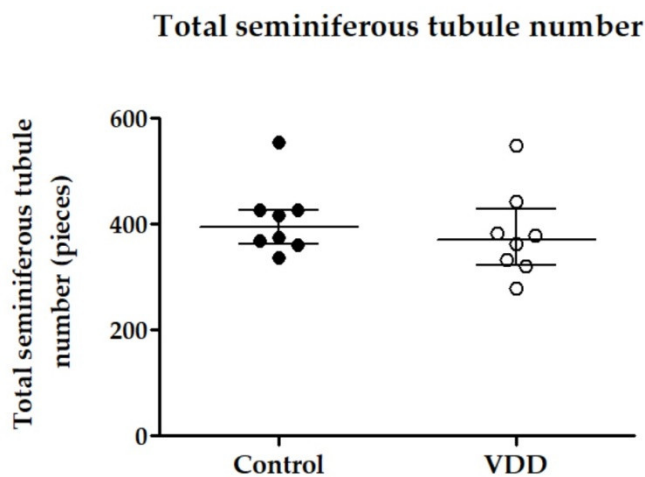

| Control/Vitamin D supplemented group ( $n = 8$ , pieces) | Vitamin D deficient/VDD group ( $n = 8$ , pieces) |
|----------------------------------------------------------|---------------------------------------------------|
| 426                                                      | 443                                               |
| 416                                                      | 279                                               |
| 361                                                      | 383                                               |
| 426                                                      | 332                                               |
| 554                                                      | 321                                               |
| 374                                                      | 549                                               |
| 369                                                      | 378                                               |
| 337                                                      | 363                                               |

**Figure S1 and Table S1: Total seminiferous tubule number per group:** Figure S1: in graph, Table S1: original data. Abbreviations: VDD = vitamin D deficient.  $n = 8$ /group. Mann-Whitney-U-test, data are in Median [IQR], n.s.

• *Average seminiferous tubule and seminiferous tubule lumen area ( $\mu\text{m}^2$ )*

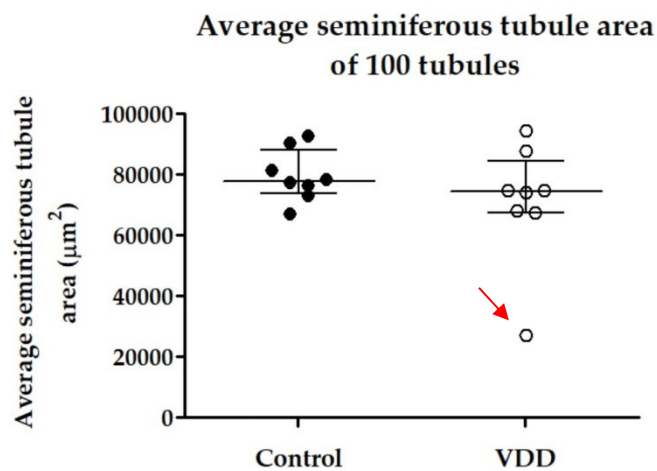

| Control/Vitamin D supplemented group ( $n = 8, \mu\text{m}^2$ ) | Vitamin D deficient/VDD group ( $n = 8, \mu\text{m}^2$ ) |
|-----------------------------------------------------------------|----------------------------------------------------------|
| 77392.840                                                       | 87900.100                                                |
| 90568.170                                                       | 74809.390                                                |
| 73110.510                                                       | 74950.830                                                |
| 78453.180                                                       | 68048.630                                                |
| 92981.960                                                       | 94346.640                                                |
| 76410.900                                                       | 27258.600                                                |
| 81535.660                                                       | 67501.790                                                |
| 67238.510                                                       | 74183.800                                                |

**Figure S2 and Table S2:** *Average seminiferous tubule area* per group: Figure S2: in graph, Table S2: original data. Abbreviations: VDD = vitamin D deficient.  $n = 8/\text{group}$ . Mann-Whitney-U-test, data are in Median [IQR], n.s.

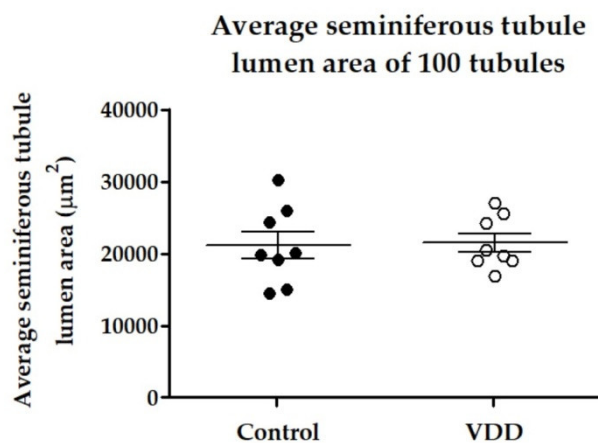

| Control/Vitamin D supplemented group ( $n = 8, \mu\text{m}^2$ ) | Vitamin D deficient/VDD group ( $n = 8, \mu\text{m}^2$ ) |
|-----------------------------------------------------------------|----------------------------------------------------------|
| 15044.930                                                       | 24255.690                                                |
| 30195.800                                                       | 20463.890                                                |
| 20081.520                                                       | 19062.920                                                |
| 19773.420                                                       | 26990.820                                                |
| 24390.210                                                       | 25501.990                                                |
| 19143.340                                                       | 16833.180                                                |
| 25901.760                                                       | 19020.470                                                |
| 14508.560                                                       | 19669.120                                                |

**Figure S3 and Table S3:** *Average seminiferous tubule lumen area* per group: Figure S3: in graph, Table S3: original data. Abbreviations: VDD = vitamin D deficient.  $n = 8/\text{group}$ . Unpaired-t-test, data are in Mean $\pm$ SEM, n.s.

• *Average seminiferous tubule and seminiferous tubule lumen perimeter (μm)*

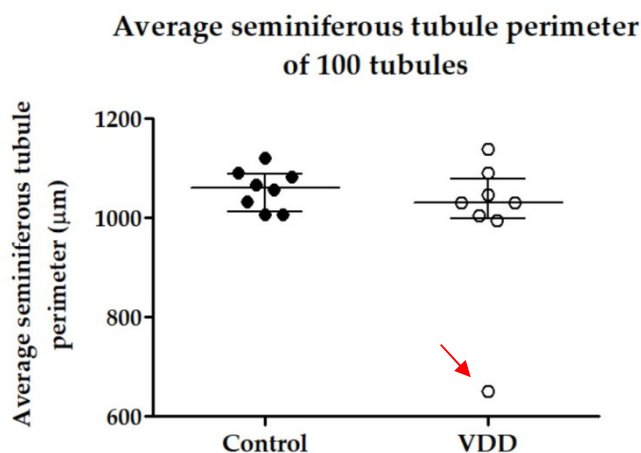

| Control/Vitamin D supplemented group ( $n = 8, \mu\text{m}$ ) | Vitamin D deficient/VDD group ( $n = 8, \mu\text{m}$ ) |
|---------------------------------------------------------------|--------------------------------------------------------|
| 1006.332                                                      | 1090.215                                               |
| 1121.538                                                      | 1047.698                                               |
| 1056.021                                                      | 1030.083                                               |
| 1066.135                                                      | 1005.809                                               |
| 1082.678                                                      | 1138.890                                               |
| 1032.218                                                      | 650.730                                                |
| 1091.270                                                      | 995.647                                                |
| 1006.779                                                      | 1030.562                                               |

**Figure S4 and Table S4:** *Average seminiferous tubule perimeter* per group: Figure S4: in graph, Table S4: original data. Abbreviations: VDD = vitamin D deficient.  $n = 8/\text{group}$ . Mann-Whitney-U-test, data are in Median [IQR], n.s.

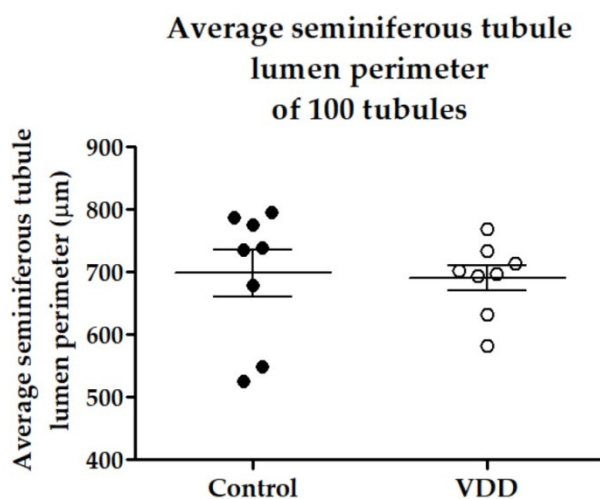

| Control/Vitamin D supplemented group ( $n = 8, \mu\text{m}$ ) | Vitamin D deficient/VDD group ( $n = 8, \mu\text{m}$ ) |
|---------------------------------------------------------------|--------------------------------------------------------|
| 525.708                                                       | 714.927                                                |
| 787.231                                                       | 694.579                                                |
| 738.916                                                       | 632.222                                                |
| 735.737                                                       | 733.656                                                |
| 795.629                                                       | 768.397                                                |
| 679.924                                                       | 581.973                                                |
| 775.971                                                       | 698.079                                                |
| 549.257                                                       | 702.360                                                |

**Figure S5 and Table S5:** *Average seminiferous tubule lumen perimeter* per group: Figure S5: in graph, Table S5: original data. Abbreviations: VDD = vitamin D deficient.  $n = 8/\text{group}$ . Unpaired-t-test, data are in Mean $\pm$ SEM, n.s.

- *Average calculated spermatogenic epithelium area and area ratio ( $\mu\text{m}^2$  and %)*

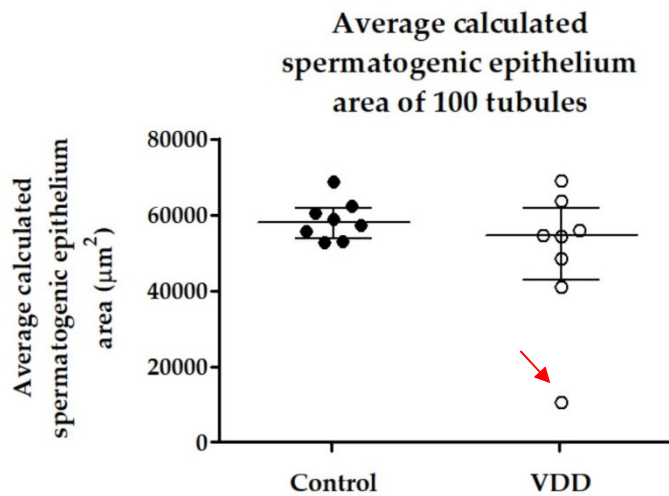

| Control/Vitamin D<br>supplemented<br>group ( $n = 8, \mu\text{m}^2$ ) | Vitamin D<br>deficient/VDD<br>group ( $n = 8, \mu\text{m}^2$ ) |
|-----------------------------------------------------------------------|----------------------------------------------------------------|
| 62347.910                                                             | 63644.410                                                      |
| 60372.370                                                             | 54345.500                                                      |
| 53028.980                                                             | 55887.910                                                      |
| 58679.770                                                             | 41057.800                                                      |
| 68591.760                                                             | 68844.650                                                      |
| 57267.560                                                             | 10425.420                                                      |
| 55633.900                                                             | 48481.320                                                      |
| 52729.940                                                             | 54514.680                                                      |

**Figure S6 and Table S6: Average calculated spermatogenic epithelium area per group:** Figure S6: in graph, Table S6: original data. Abbreviations: VDD = vitamin D deficient.  $n = 8/\text{group}$ . Mann-Whitney-U-test, data are in Median [IQR], n.s.

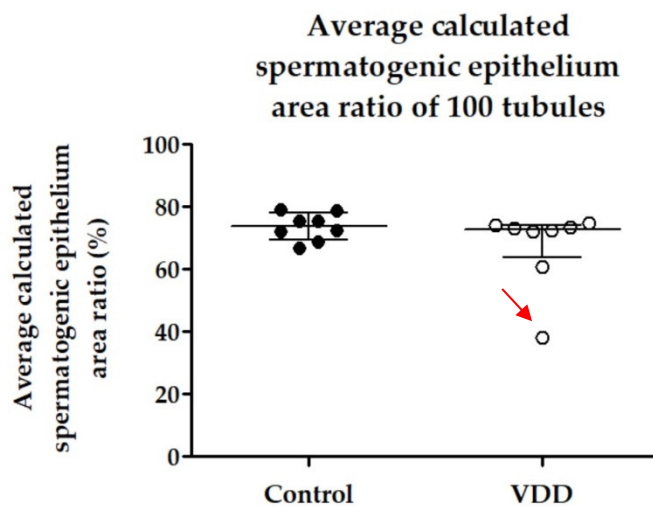

| Control/Vitamin D<br>supplemented<br>group ( $n = 8, \%$ ) | Vitamin D<br>deficient/VDD<br>group ( $n = 8, \%$ ) |
|------------------------------------------------------------|-----------------------------------------------------|
| 79.211390                                                  | 72.594150                                           |
| 66.998090                                                  | 73.546010                                           |
| 72.623160                                                  | 74.784300                                           |
| 75.376320                                                  | 60.954610                                           |
| 72.070430                                                  | 73.191610                                           |
| 75.449760                                                  | 38.262200                                           |
| 68.741940                                                  | 72.310260                                           |
| 78.938330                                                  | 74.163710                                           |

**Figure S7 and Table S7: Average calculated spermatogenic epithelium area ratio per group:** Figure S7: in graph, Table S7: original data. Abbreviations: VDD = vitamin D deficient.  $n = 8/\text{group}$ . Mann-Whitney-U-test, data are in Median [IQR], n.s.

• *Average seminiferous tubule and seminiferous tubule lumen diameter (μm)*

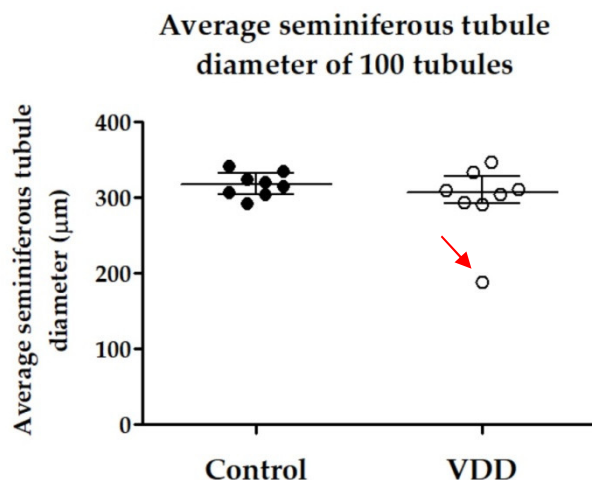

| Control/Vitamin D supplemented group ( <i>n</i> = 8, μm) | Vitamin D deficient/VDD group ( <i>n</i> = 8, μm) |
|----------------------------------------------------------|---------------------------------------------------|
| 306.8720                                                 | 334.4965                                          |
| 342.4980                                                 | 309.8680                                          |
| 304.7790                                                 | 311.8825                                          |
| 320.7315                                                 | 294.4070                                          |
| 335.4900                                                 | 346.9105                                          |
| 314.9790                                                 | 188.2440                                          |
| 325.2140                                                 | 291.8850                                          |
| 292.8710                                                 | 304.2200                                          |

**Figure S8 and Table S8:** *Average seminiferous tubule diameter* per group: Figure S8: in graph, Table S8: original data. Abbreviations: VDD = vitamin D deficient. *n* =8/group. Mann-Whitney-U-test, data are in Median [IQR], n.s.

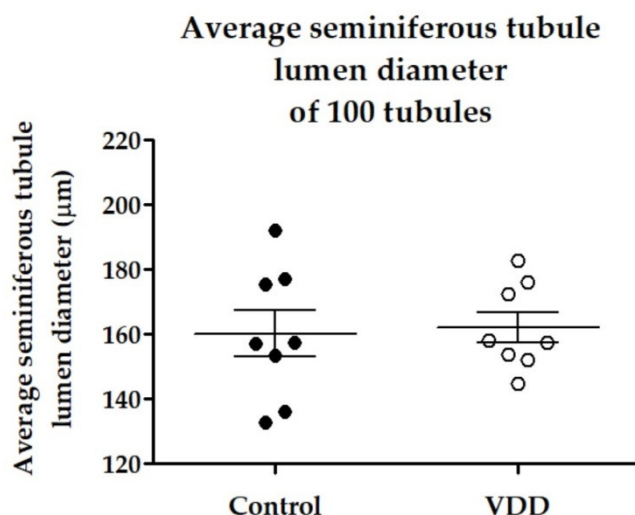

| Control/Vitamin D supplemented group ( <i>n</i> = 8, μm) | Vitamin D deficient/VDD group ( <i>n</i> = 8, μm) |
|----------------------------------------------------------|---------------------------------------------------|
| 136.0125                                                 | 172.3830                                          |
| 192.2115                                                 | 158.1965                                          |
| 157.5620                                                 | 153.7800                                          |
| 157.1260                                                 | 182.7540                                          |
| 175.5720                                                 | 176.2065                                          |
| 153.5840                                                 | 144.7330                                          |
| 177.0710                                                 | 152.3010                                          |
| 132.9770                                                 | 157.3555                                          |

**Figure S9 and Table S9:** *Average seminiferous tubule lumen diameter* per group: Figure S9: in graph, Table S9: original data. Abbreviations: VDD = vitamin D deficient. *n* = 8/group. Unpaired-t-test, data are in Mean±SEM, n.s.

• *Average spermatogenic epithelium thickness (μm)*

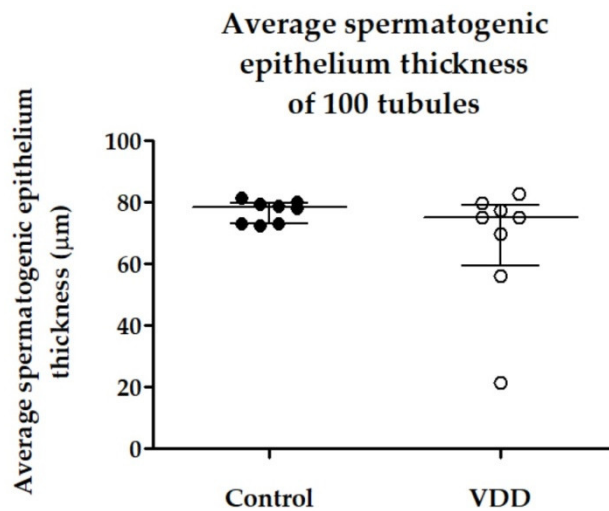

| Control/Vitamin D supplemented group ( <i>n</i> = 8, μm) | Vitamin D deficient/VDD group ( <i>n</i> = 8, μm) |
|----------------------------------------------------------|---------------------------------------------------|
| 81.532000                                                | 79.7232                                           |
| 72.604630                                                | 75.1204                                           |
| 73.143600                                                | 77.5466                                           |
| 80.129400                                                | 56.0182                                           |
| 78.802400                                                | 82.9346                                           |
| 79.602800                                                | 21.5972                                           |
| 73.252000                                                | 69.8434                                           |
| 78.185800                                                | 75.2277                                           |

**Figure S10 and Table S10: Average spermatogenic epithelium thickness per group:** Figure S10: in graph, Table S10: original data. Abbreviations: VDD = vitamin D deficient. *n* = 8/group. Mann-Whitney-U-test, data are in Median [IQR], n.s.

According to the figures and tables, there were an extremely outlier in the VDD group in case of seminiferous tubule area, perimeter, diameter and calculated spermatogenic epithelium area, area ratio and thickness (data marked with red arrow in figures and red color in tables). Thus, we would like to show the histological image of that testicular tissue (Picture S1-S2).

As we can see on the pictures, in the ‘outlier’ tissue, smaller tubule area, perimeter, diameter can be seen, spermatogenic epithelium (SE) is thinner, as well as the SE area and area ratio. The exact measured numbers express the visually-noticeable difference.

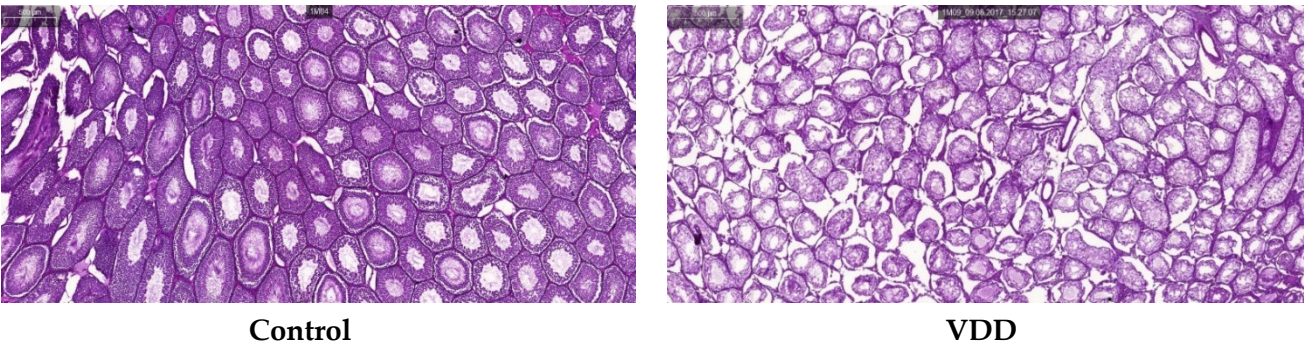

**Picture S1-S2: Representative histological picture of testicular tissue of one of the control group (left) and of the outlier of VDD group (right).** Pictures were made with CaseViewer software. Scale bar 500 μm.



• *Vitamin D Receptor (VDR)-positively-stained area percentage (%)*

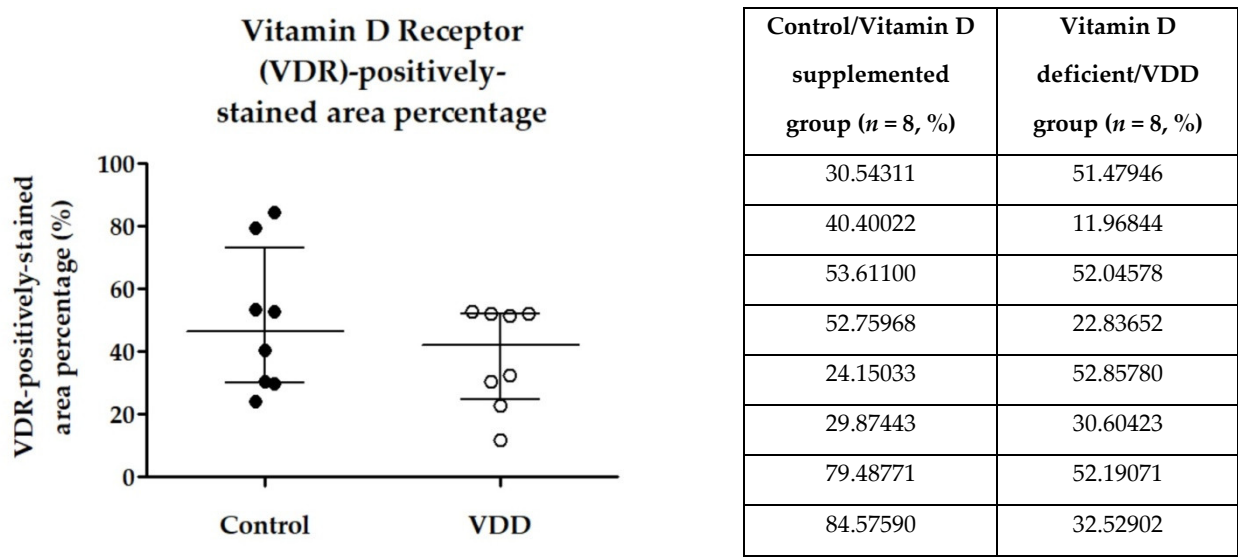

**Figure S11 and Table S11:** *Vitamin D Receptor (VDR)-positively-stained area percentage* per group: Figure S11: in graph, Table S11: original data. Abbreviations: VDD = vitamin D deficient. *n* = 8/group. Mann-Whitney-U-test, data are in Median [IQR], n.s.

According to our negative results, we hypothesize that short-term (8-week-long) vitamin D deficiency does not affect the structure of the spermatogenic tissue. Further basic, -translational and clinical investigations are required to examine the possible effects of Vitamin D supply and deficiency on testicular tissue, spermatogenesis and the possible role of Vitamin D in male fertility-infertility.

The original manuscript describes a detailed and easy-to-follow methodological description of a suggested, well-reproducible quantitative assessment of testicular tissue.
